# Supplementary material for: Longitudinal Analysis of Estrogen Receptor Gene Methylation, Estradiol, and Depressive Symptoms during the Perinatal Period
Source: Research Square preprint supplement (doi:10.21203/rs.3.rs-6578336/v1), 2025-06-02
Supplement: Supplementary file 1 [file 551119568be0632c676c836c.docx]

**Supplementary material for:**

**Longitudinal Analysis of Estrogen Receptor Gene Methylation, Estradiol, and Depressive Symptoms during the Perinatal Period**

Gianna Zorzini, MSca, Alexandra Johann, PhDa, Jelena Dukic, MSca, Elena Gardini, PhDa & Ulrike Ehlert, PhDa

a Department of Clinical Psychology and Psychotherapy, University of Zurich, Zurich, Switzerland

**Corresponding author:**

Prof. Dr. Ulrike Ehlert, University of Zurich, Institute of Psychology, Clinical Psychology and Psychotherapy, Binzmuehlestrasse 14 / Box 26, 8050 Zurich, Switzerland, Telephone: +41 44 635 73 50, E-mail: u.ehlert@psychologie.uzh.ch

**Contents**

Table S1. Pearson correlations of overall *ESR1*, *ESR2* and *GPER* methylation at 34-36 weeks of gestation………..2

Table S2. Pearson correlations of individual CpG sites in *ESR1* at 34-36 weeks of gestation………………….……2

Table S3. Pearson correlations of overall *ESR1*, *ESR2* and *GPER* methylation at 8-12 weeks postpartum………2

Table S4. Spearman correlations of individual CpG sites in *ESR1* at 8-12 weeks postpartum…………………….2

Table S5. Results of multivariate linear regression during the postpartum period…………………………………3

Table S6. Results of multivariate linear regression predicting delta methylation based on change scores…….…..3

Table S7. Results of multivariate linear regression predicting delta methylation based on scores from pregnancy…3

| **Table S1**  Pearson correlations of overall *ESR1*, *ESR2* and *GPER* methylation at 34-36 weeks of gestation. | | | | | | | |
| --- | --- | --- | --- | --- | --- | --- | --- |
| **Variable** | **N** | **1** | **2** | **3** | **4** | **5** | **6** |
| 1. *ESR1* Methylation | 69 | - |  |  |  |  |  |
| 2. *ESR2* Methylation | 92 | .14 | - |  |  |  |  |
| 3. *GPER* Methylation | 70 | -.23 | .14 | - |  |  |  |
| 4. EPDS | 159 | -.29a* | -.01a | .15a | - |  |  |
| 5. E2 | 126 | .10 | .17 | .12 | .05a | - |  |
| 6. Age | 159 | .09 | -.11 | -.23 | .004a | .007 | - |
| Note. **p* < .05, aSpearman rank correlation, EPDS Edinburgh Postnatal Depression Scale, E2 estradiol. | | | | | | | |

| **Table S2**  Pearson correlations of individual CpG sites in *ESR1* at 34-36 weeks of gestation. | | | | | | | | | | | | | |
| --- | --- | --- | --- | --- | --- | --- | --- | --- | --- | --- | --- | --- | --- |
| **Variable** | **N** | **1** | **2** | **3** | **4** | **5** | **6** | **7** | **8** | **9** | **10** | **11** | **12** |
| 1. CpG 1 | 69 | - |  |  |  |  |  |  |  |  |  |  |  |
| 2. CpG 2 | 69 | .71* | - |  |  |  |  |  |  |  |  |  |  |
| 3. CpG 3 | 69 | .52a* | .53a* | - |  |  |  |  |  |  |  |  |  |
| 4. CpG 4 | 69 | .65* | .76* | .33a* | - |  |  |  |  |  |  |  |  |
| 5. CpG 5 | 69 | .65* | .64* | .34a* | .61* | - |  |  |  |  |  |  |  |
| 6. CpG 6 | 69 | .59a* | .51a* | .24a* | .47a* | .52a* | - |  |  |  |  |  |  |
| 7. CpG 7 | 69 | .51* | .61* | .31a* | .52* | .71* | .38a* | - |  |  |  |  |  |
| 8. CpG 8 | 69 | .29a* | .28a* | .17a | .29a* | .51a* | .11a | .28a* | - |  |  |  |  |
| 9. CpG 9 | 69 | .44* | .59* | .41a* | .44* | .65* | .45a* | .56* | .47a* | - |  |  |  |
| 10. EPDS | 159 | -.24a* | -.39a* | -.21a | -.19a | -.14a | -.18a | -.17a | -.11a | -.13a | - |  |  |
| 11. E2 | 126 | .08 | .08 | .08a | .09 | .28* | -.12a | .11 | .15a | .08 | .05a | - |  |
| 12. Age | 159 | .12 | .12 | .11a | .04 | .12 | -.05a | -.01 | .07a | -.001 | .004a | .007 | - |
| Note. **p* < .05, aSpearman rank correlation, EPDS Edinburgh Postnatal Depression Scale, E2 estradiol. | | | | | | | | | | | | | |

| **Table S3**  Pearson correlations of overall *ESR1*, *ESR2* and *GPER* methylation at 8-12 weeks postpartum. | | | | | | | |
| --- | --- | --- | --- | --- | --- | --- | --- |
| **Variable** | **N** | **1** | **2** | **3** | **4** | **5** | **6** |
| 1. *ESR1* Methylation | 134 | - |  |  |  |  |  |
| 2. *ESR2* Methylation | 127 | -.11a | - |  |  |  |  |
| 3. *GPER* Methylation | 135 | -.03 | .07a | - |  |  |  |
| 4. EPDS | 140 | -.01a | .04a | .006a | - |  |  |
| 5. E2 | 126 | -.08a | -.04a | .21a* | .21a* | - |  |
| 6. Age | 159 | -.07 | .13a | .01 | -.01a | .12a | - |
| Note. **p* < .05, aSpearman rank correlation, EPDS Edinburgh Postnatal Depression Scale, E2 estradiol. | | | | | | | |

| **Table S4**  Spearman correlations of individual CpG sites in *ESR1* at 8-12 weeks postpartum. | | | | | | | | | | | | | |
| --- | --- | --- | --- | --- | --- | --- | --- | --- | --- | --- | --- | --- | --- |
| **Variable** | **N** | **1** | **2** | **3** | **4** | **5** | **6** | **7** | **8** | **9** | **10** | **11** | **12** |
| 1. CpG1 | 134 | - |  |  |  |  |  |  |  |  |  |  |  |
| 2. CpG2 | 134 | .39* | - |  |  |  |  |  |  |  |  |  |  |
| 3. CpG 3 | 134 | .46* | .61* | - |  |  |  |  |  |  |  |  |  |
| 4. CpG 4 | 134 | .33* | .54* | .51a* | - |  |  |  |  |  |  |  |  |
| 5. CpG5 | 134 | .32* | .49* | .54* | .59* | - |  |  |  |  |  |  |  |
| 6. CpG 6 | 134 | .29* | .43* | .34* | .46* | .43* | - |  |  |  |  |  |  |
| 7. CpG 7 | 134 | .35* | .57* | .42* | .55* | .47* | .54* | - |  |  |  |  |  |
| 8. CpG 8 | 134 | .26* | .35* | .36* | .36* | .32* | .25* | .41* | - |  |  |  |  |
| 9. CpG9 | 134 | .22* | .41* | .19a* | .49a* | .46* | .26* | .43* | .33* | - |  |  |  |
| 10. EPDS | 154 | -.01 | .01 | -.002 | -.01 | -.02 | -.01 | -.08 | -.05 | -.12 | - |  |  |
| 11. E2 | 126 | -.06 | -.19* | -.15 | -.03 | -.09 | -.01 | -.04 | -.01 | -.05 | .21* | - |  |
| 12. Age | 159 | -.05 | -.008 | -.06a | -.09a | .09 | -.06 | -.04 | -.01 | -.04a | -.01 | .12 | - |
| Note. **p* < .05, aPearson correlation, EPDS Edinburgh Postnatal Depression Scale, E2 estradiol. | | | | | | | | | | | | | |

| **Table S5**  Results of multivariate linear regression during the postpartum period. | | | | | | | | |
| --- | --- | --- | --- | --- | --- | --- | --- | --- |
| **Variable** | **EPDS** |  | **E2** |  | **Age** |  | **History of depression** | |
|  | **β** | ***p*** | **β** | ***p*** | **β** | ***p*** | **β** | ***p*** |
| *ESR1* | 0.055 | 0.590 | -0.153 | 0.130 | -0.040 | 0.690 | 0.133 | 0.193 |
| CpG 1 | 0.030 | 0.768 | -0.077 | 0.45 | 0.012 | 0.904 | -0.030 | 0.766 |
| CpG 2 | 0.056 | 0.568 | -0.130 | 0.187 | -0.066 | 0.495 | 0.275 | 0.006 |
| CpG 3 | 0.038 | 0.707 | -0.114 | 0.262 | -0.048 | 0.635 | 0.070 | 0.491 |
| CpG 4 | -0.074 | 0.473 | -0.046 | 0.652 | -0.022 | 0.829 | -0.035 | 0.731 |
| CpG 5 | 0.009 | 0.929 | -0.188 | 0.064 | 0.037 | 0.707 | 0.035 | 0.730 |
| CpG 6 | 0.081 | 0.432 | -0.061 | 0.549 | -0.022 | 0.825 | -0.013 | 0.898 |
| CpG 7 | 0.071 | 0.491 | -0.039 | 0.696 | -0.061 | 0.542 | 0.160 | 0.119 |
| CpG 8 | 0.075 | 0.467 | -0.088 | 0.390 | 0.010 | 0.915 | 0.040 | 0.698 |
| CpG 9 | -0.184 | 0.073 | -0.046 | 0.642 | -0.033 | 0.740 | 0.036 | 0.649 |
| *ESR2* | -0.010 | 0.924 | 0.001 | 0.989 | 0.057 | 0.584 | 0.137 | 0.194 |
| *GPER* | -0.001 | 0.992 | 0.185 | 0.059 | 0.0432 | 0.662 | 0.086 | 0.386 |
| Note. EPDS Edinburgh Postnatal Depression Scale, E2 estradiol. | | | | | | | | |

| **Table S6**  Results of multivariate linear regression predicting delta methylation based on change scores. | | | | | | | | |
| --- | --- | --- | --- | --- | --- | --- | --- | --- |
| **Variable** | **Delta EPDS** | | **Delta E2** | | **Age** | | **History of depression** | |
|  | β | *p* | β | *p* | β | *p* | β | *p* |
| Delta *ESR1* | -0.070 | 0.643 | -0.187 | 0.209 | -0.163 | 0.281 | -0.072 | 0.628 |
| Delta CpG 9 | -0.039 | 0.800 | 0.081 | 0.587 | -0.081 | 0.596 | -0.121 | 0.428 |
| Note. EPDS Edinburgh Postnatal Depression Scale, E2 estradiol. | | | | | | | | |
|  |  |  |  |  |  |  |  |  |

| **Table S7**  Results of multivariate linear regression predicting delta methylation based on scores from pregnancy. | | | | | | | | |
| --- | --- | --- | --- | --- | --- | --- | --- | --- |
| **Variable** | **EPDS at 34-36 weeks of gestation** | | **E2 at 34-36 weeks of gestation** | | **Age** | | **History of depression** | |
|  | β | *p* | β | *p* | β | *p* | β | *p* |
| Delta *ESR1* | 0.311 | 0.036*a | 0.216 | 0.121 | -0.248 | 0.078 | 0.032 | 0.823 |
| Delta CpG 9 | -0.091 | 0.560 | -0.098 | 0.511 | -0.013 | 0.927 | -0.178 | 0.260 |
| Note. **p* < .05, asignificant after correction for multiple testing, EPDS Edinburgh Postnatal Depression Scale, E2 estradiol. | | | | | | | | |
|  |  |  |  |  |  |  |  |  |
